# Supplementary material for: Montelukast Prevents Mice Against Acetaminophen-Induced Liver Injury
Source: PubMed Central journal article supplement (PMC6759817; doi:10.3389/fphar.2019.01070), 2019-09-18

## Supplementary materials

### Supplementary Figure 1. The mRNA level of *Blt1*, *Blt2* and *Cysltr2* in mice liver after acute APAP administration.

C57BL/6J mice fasted overnight, then were orally administered with saline or APAP (200 mg/kg) for 12 hours. The hepatic mRNA expression of *Blt1*, *Blt2* and *Cysltr2* were detected by RT-qPCR analysis. Data are mean  $\pm$  SEM, n = 5 for saline group, n=6 for APAP group. \* $P < 0.05$ .

### Supplementary Figure 2. APAP treatment upregulated *Cysltr1* expression *in vivo*.

**A-B**, Primary hepatocytes were treated with vehicle or APAP (2.5 mM) for 24 hours. The mRNA levels of *Cysltr1*, *Cysltr2*, *Blt1* and *Blt2* in primary hepatocytes were detected by RT-qPCR analysis. Data are mean  $\pm$  SEM, n = 5 for each group, \* $p < 0.05$ . **C**, Western blot analysis of *Cysltr1*. Primary hepatocytes were treated with 2.5 mM APAP for 0, 3, 8 or 24 hours. **D**, Quantification of *Cysltr1* to  $\beta$ -actin. Data are mean  $\pm$  SEM, n = 5, \* $p < 0.05$ . Experiments were repeated 3 times with similar results.

### Supplementary Figure 3. Montelukast administration did not affect APAP phase I/II metabolizing enzymes.

**A-C**, The hepatic mRNA levels of *Cyp1a2*, *Cyp 2a1*, and *Cyp3a11*. **D-E**, The mRNA levels of *Ugt1a1* and *Sult2a1*. Data are mean  $\pm$  SEM, n = 5 for saline groups, n = 7 for APAP groups.

### Supplementary Figure 4. The hepatic mRNA levels of transporters and GSTs.

**A-C**, The expression of *Mrp2*, *Mrp3* and *Mrp4*. **D-F**, The hepatic mRNA levels of *GSTa1*, *GSTM1*, and *GSTM2*. Data are mean  $\pm$  SEM, n = 5 for saline groups, n = 7 for APAP groups.

### Supplementary Figure 5. Montelukast inhibit *Cysltr1* expression in APAP-treated hepatocytes.

**A**, Primary hepatocytes were pretreated with montelukast (1, 5 and 10  $\mu$ M) or vehicle (DMSO) 1 hour before APAP (2.5 mM) administration. Quantification of LDH released into the culture medium of primary hepatocyte after treatment with 2.5 mM of APAP for 24 hours. Data are mean  $\pm$  SEM, n=3 for each group, \*\* $p < 0.01$ . **B**, Primary hepatocytes were pretreated with montelukast (5  $\mu$ M) or vehicle (DMSO) 1 hour before APAP (2.5 mM) administration. Western blot analysis of *Cysltr1*. Experiments were repeated 3 times with similar results.

### Supplementary Figure 6. Zafirlukast inhibit APAP-induced cell damage.

**A-B**, Primary hepatocytes were pretreated with zafirlukast (5  $\mu$ M) or vehicle (DMSO) 1 hour before APAP (2.5 mM) administration. **A**, Quantification of LDH released into the culture medium of primary hepatocyte after treatment with 2.5 mM of APAP for 24 hours. Data are mean  $\pm$  SEM, n = 3 for each group, \*\* $p < 0.01$ . **B**, Primary hepatocytes were incubated with 5mg/L JC-1 dye for 30 min at 37°C in the dark and washed twice with the dye buffer. Then the cells were quickly subjected to fluorescence microscope for captured red or green fluorescence. Experiments were repeated 3 times with similar results.

### Supplementary Figure 7. Montelukast inhibit LTD<sub>4</sub>-induced cell death.

**A-C**, Primary hepatocytes were pretreated with montelukast (5  $\mu$ M) or vehicle (DMSO) 1 hour before LTD<sub>4</sub> (100 nM) administration. **A**, Representative morphological images of primary hepatocytes treated with LTD<sub>4</sub> for 24 hours. **B**, Quantification of LDH released into the culture medium of primary

hepatocyte after treatment with 2.5 mM of APAP for 24 hours. Data are mean  $\pm$ SEM, n = 3 for each group. \* $p$  < 0.05. C, Primary hepatocytes were incubated with 5mg/L JC-1 dye for 30 min at 37°C in the dark and washed twice with the dye buffer. Then the cells were quickly subjected to fluorescence microscope for captured red or green fluorescence. Experiments were repeated 3 times with similar results.

**Supplementary Table 1: List of specific primers used for real-time quantitative PCR**

| <b>Genes</b>                   | <b>Forward sequence(5'-3')</b> | <b>Reverse sequence(5'-3')</b> |
|--------------------------------|--------------------------------|--------------------------------|
| <i>18s</i>                     | TTGACTCAACACGGGAAACC           | AGACAAATCGCTCCACCAAC           |
| <i>Blt1</i>                    | ATGGCTGCAAACACTACATCTC         | GACCGTGCGTTTCTGCATC            |
| <i>Blt2</i>                    | ATGTCTGTCTGCTACCGTCC           | AGCTCCATACTACGAAGCCAT          |
| <i>Cysltr1</i>                 | CCTCTCCGTGTGGTCTATTATGT        | ATGCAAACGAACCTGGCTTTT          |
| <i>Cysltr2</i>                 | TGTCACCAGTGTCAGGAGTG           | ACTTTTGAGGACTCAGCTCCAA         |
| <i>Mcp1</i>                    | GCTGGAGAGCTACAAGAGGATC         | GTCAACTTCACATTCAAAGGTGC        |
| <i>Tnf-<math>\alpha</math></i> | GGCGGTGCCTATGTCTCA             | AGGGTCTGGGCCATAGAA             |
| <i>Il-6</i>                    | TTCTTGGGACTGATGCTG             | CTCATTTCACGATTTCCC             |
| <i>Il-18</i>                   | CACATGCGCCTTGTGATGAC           | TGCAGCCTCGGGTATTCTG            |

# Supplementary Figure 1

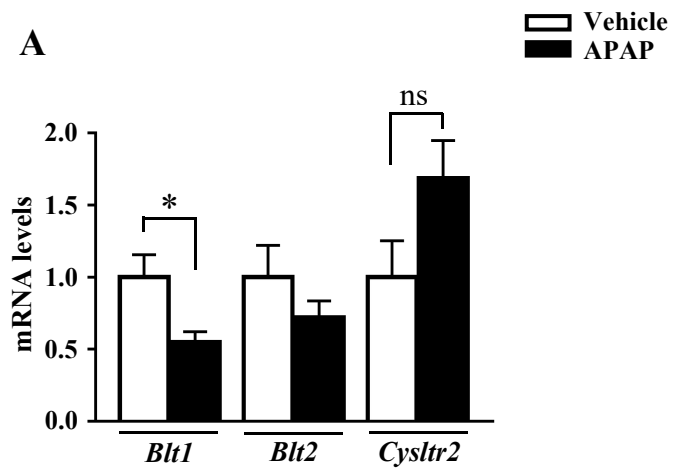

# Supplementary Figure 2

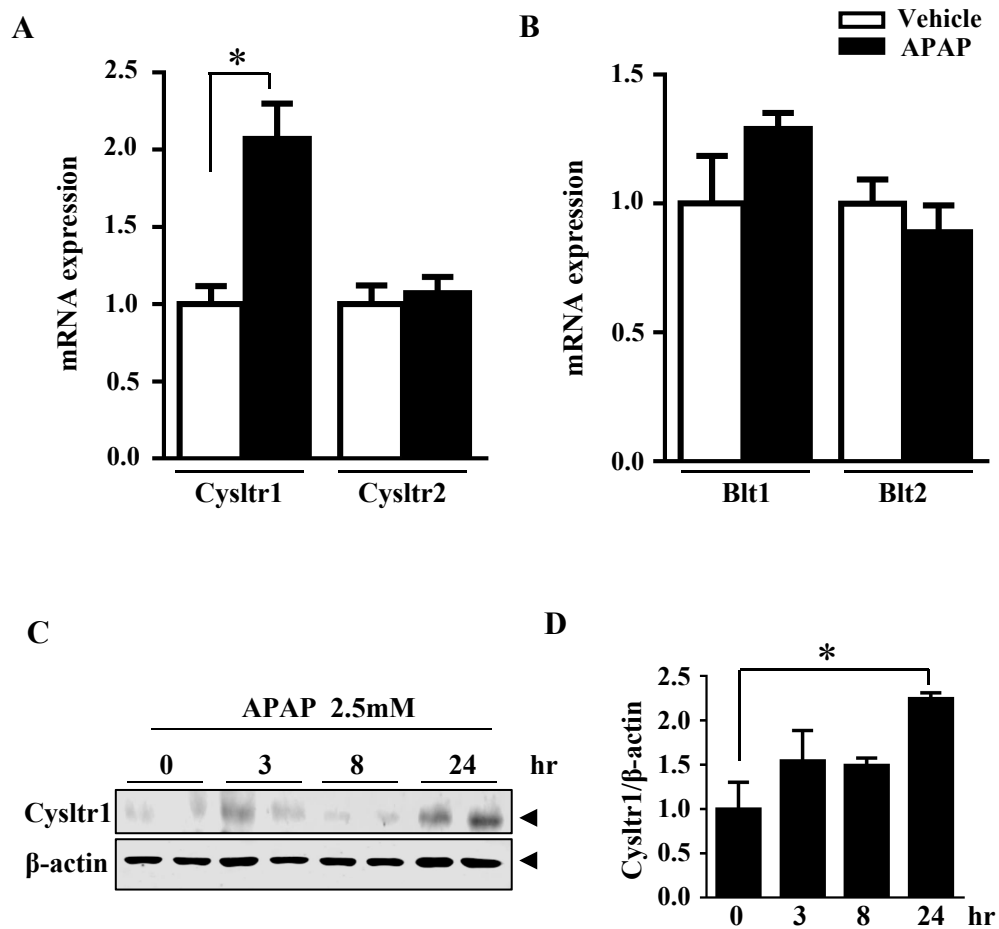

# Supplementary Figure 3

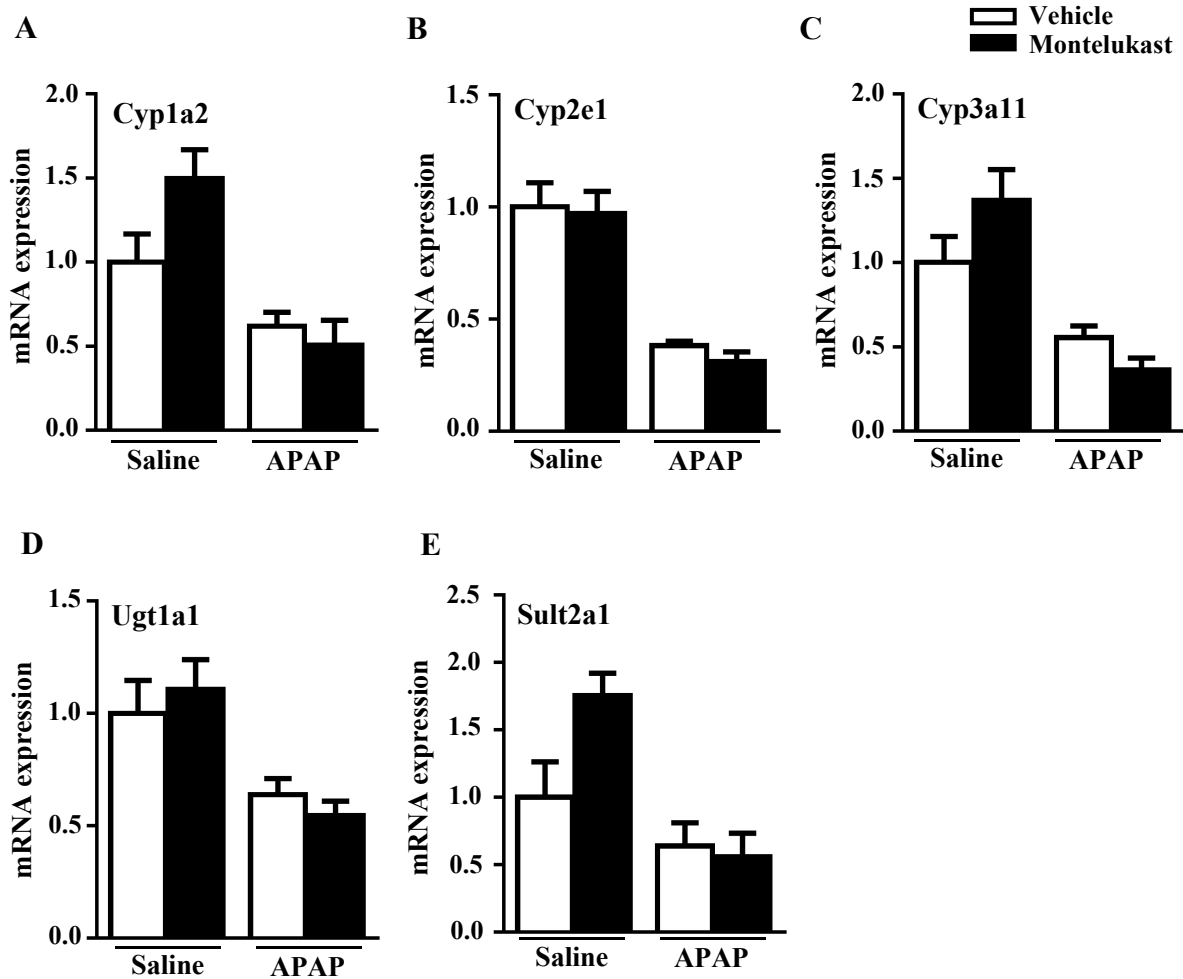

# Supplementary Figure 4

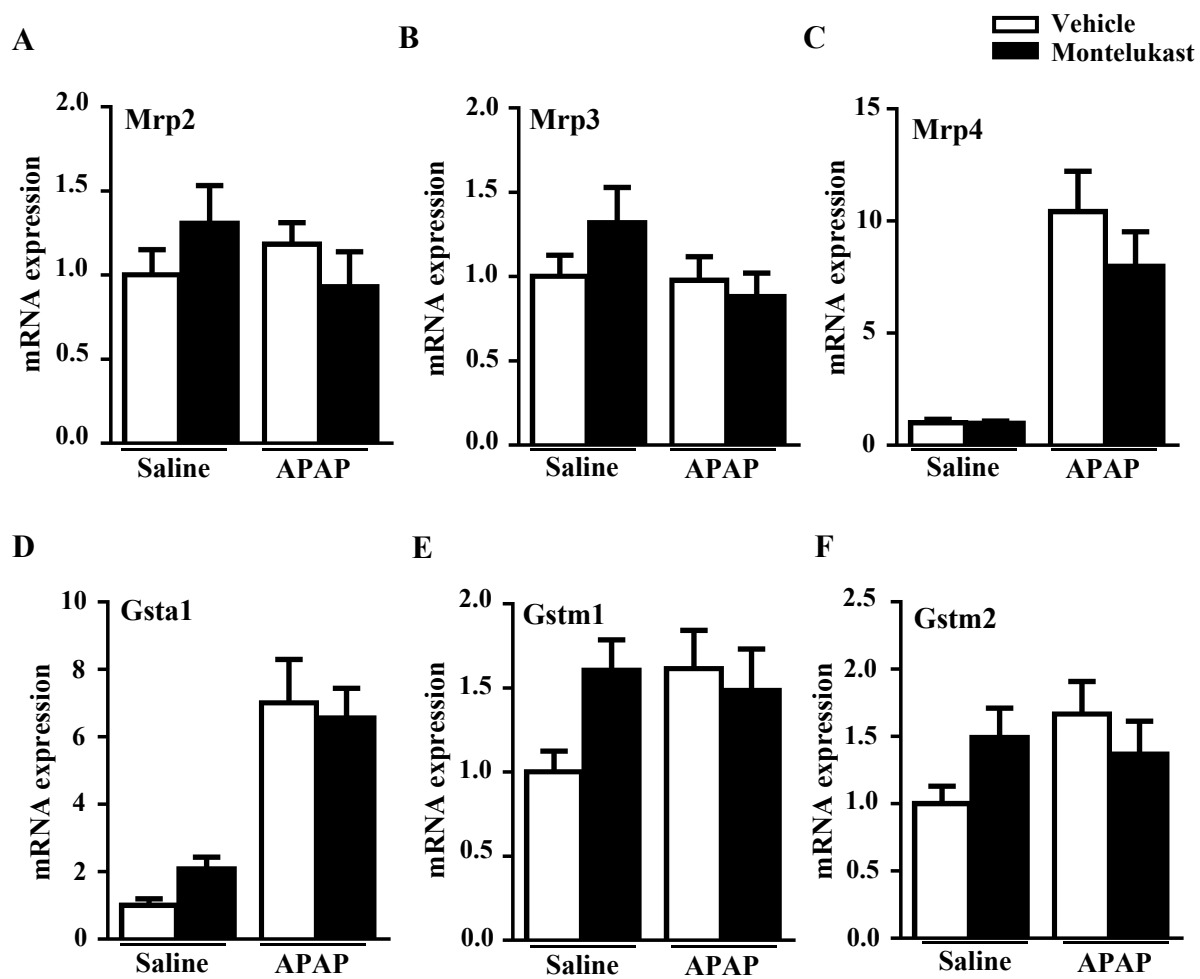

# Supplementary Figure 5

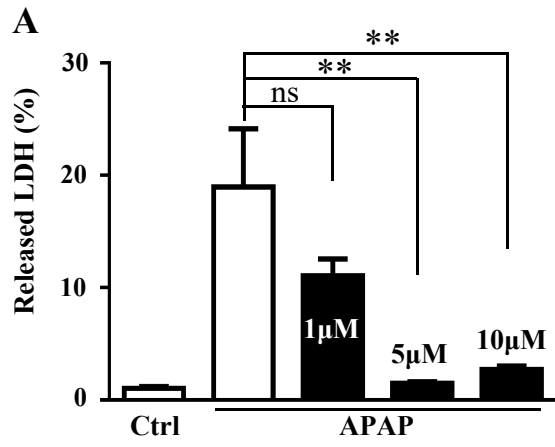

**B**

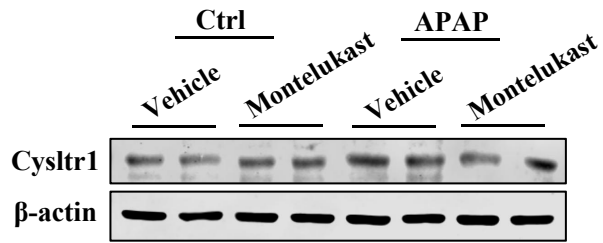



# Supplementary Figure 6

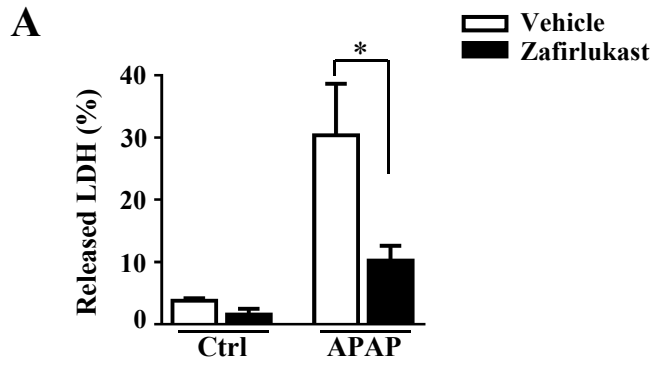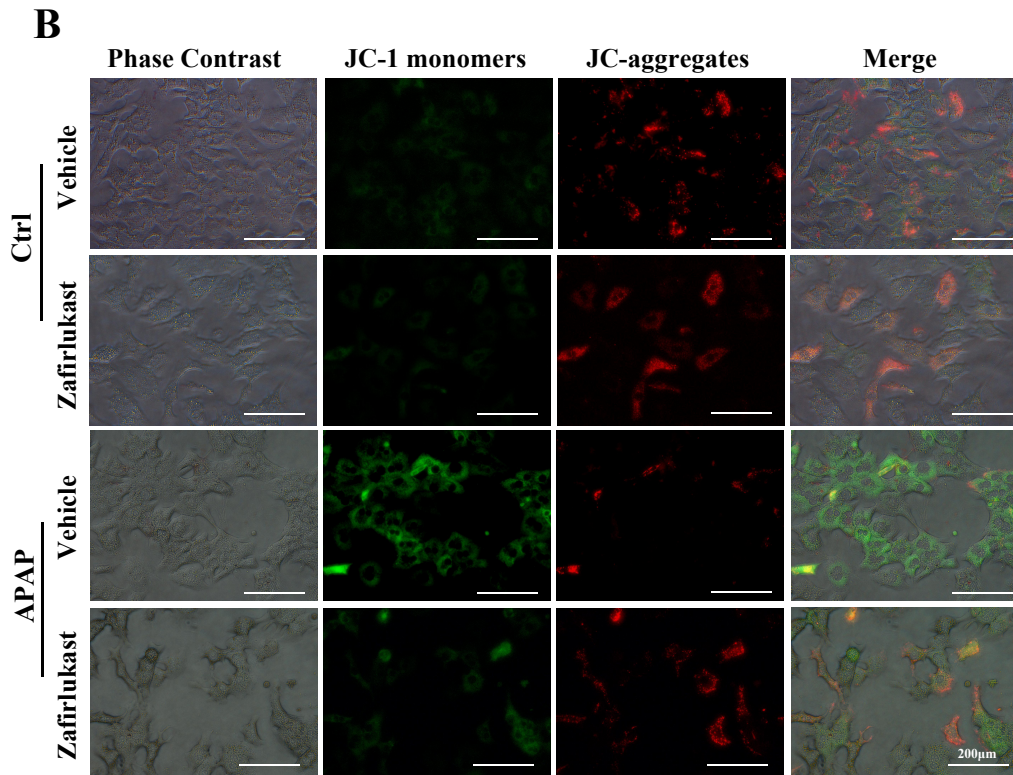

# Supplementary Figure 7

**A**

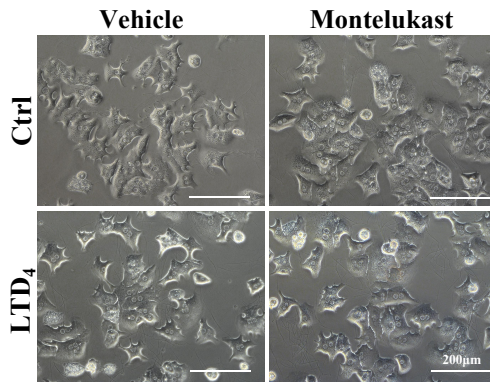

**B**

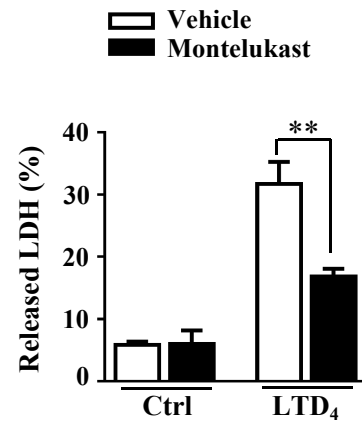

**C**

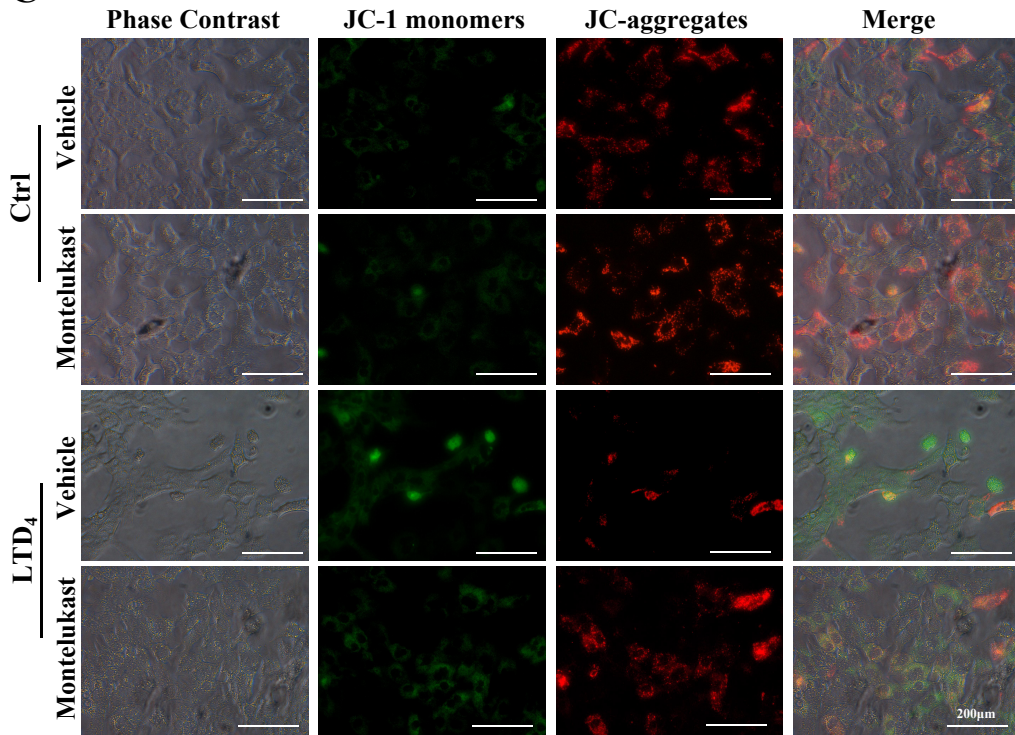

Supplement: DataSheet_1.pdf [file DataSheet_1.pdf]
